# Supplementary material
Source: Research Square preprint supplement (doi:10.21203/rs.3.rs-9646723/v1)
Supplement: Supplementary file 1 [file 9c6504ad3d56a583aa2ad615.xlsx]

## Sheet: Index
Sheet name	Description
Fig1_flow_diagram	STROBE-style participant flow diagram counts (Figure 1)
Fig2_cutoff_sensitivity	Cutoff sensitivity analysis: β by k=1..6 (Figure 2)
Fig3_RCS_dose_response	Restricted cubic spline dose-response (Figure 3)
Fig4_PSM_balance	Propensity score matching covariate balance (Figure 4)
Fig5_quantile_regression	Quantile regression at five percentiles (Figure 5)
Fig6_subclock_decomposition	Sub-clock decomposition by biomarker domain (Figure 6)
Fig7_mediation_decomposition	Multi-mediator NIE/NDE decomposition (Figure 7)
Fig8_subgroup_forest	Subgroup-specific OD effects (Figure 8)
Fig9_KaplanMeier	Kaplan-Meier survival summary (Figure 9)
Fig10_triangulation	Triangulation of OD effect across methods (Figure 10)
Fig11_finegray_competing	Fine-Gray competing-risks subdistribution HRs (Figure 11)
Fig12_cox_subgroup_forest	Cox subgroup forest plot data (Figure 12)
Fig13_decision_curve	Decision curve analysis net benefits (Figure 13)
FigS1_NLR_validation	NLR-for-HSCRP empirical validation (Figure S1)
FigS2_clock_replication	Methodological replication NHANES 2011-2012 (Figure S2)
FigS3_time_varying	Time-varying Cox sensitivity (Figure S3)
FigS4_PBA	Bayesian probabilistic bias analysis (Figure S4)
Table_primary_models	Primary regression models for Tables 2, 4 (full)
Table_cox_mortality	Cox mortality table (Table 6)
Fig14_cumulative_mediation	Cumulative biomarker-domain mediation decomposition (Figure 14)

## Sheet: Fig1_flow_diagram
Stage	N	Notes
NHANES 2013-2014 participants	10175	Source
Adults aged ≥40	3815	Excluded n=6360 aged <40
Eligible for chemosensory exam	3708	Excluded n=107 not in chemosensory frame
Analytic sample (valid 8-item PST)	3519	Excluded n=189 incomplete PST
Cross-sectional analysis (M3-eligible)	2870	Cross-sectional regression sample
Mortality follow-up (LMF)	3512	7 ineligible (ELIGSTAT≠1)
Cox-eligible after M3 covariates	2983	302 events

## Sheet: Fig2_cutoff_sensitivity
k	cases	beta	se	lcl	ucl	p
1	2402	0.370417	0.402993	-0.419449	1.16028	0.358009
2	1327	0.510554	0.420242	-0.313121	1.33423	0.224403
3	630	0.991207	0.447138	0.114817	1.8676	0.0266381
4	311	2.4774	0.860156	0.791491	4.1633	0.0039746
5	131	1.13455	1.69382	-2.18533	4.45443	0.502973
6	61	-0.125713	1.44162	-2.95129	2.69986	0.930511

## Sheet: Fig5_quantile_regression
tau	beta	method	note
0.1	1.33	QR_LP	lower tail
0.25	1.383	QR_LP	lower quartile
0.5	1.583	QR_LP	median (robust)
0.75	2.076	QR_LP	upper quartile
0.9	1.928	QR_LP	upper tail

## Sheet: Fig6_subclock_decomposition
domain	beta	se	p	n
immune	0.342763	0.0396833	0	2990
metabolic	0.114968	0.0450697	0.0107449	2990
renal	0.380072	0.0276206	0	2990
hepatic	0.202105	0.0184797	0	2990

## Sheet: Fig7_mediation_decomposition
Component	Estimate (years)	95% CI lower	95% CI upper	Proportion mediated (%)
Total effect (PE)	2.446	1.449	3.332	—
Joint NIE (4 mediators)	1.69	1.274	2.149	69.1
Direct effect (NDE)	0.756	-0.012	1.508	30.9
NIE: Inflammation (log NLR)	0.388	0.027	0.757	15.9
NIE: Renal function (Cr+BUN z)	0.745	0.388	1.131	30.5
NIE: Metabolic (HbA1c z)	0.265	-0.062	0.579	10.8
NIE: Hepatic (ALP z)	0.292	0.142	0.45	11.9

## Sheet: Fig11_finegray_competing
Outcome	sHR	95% CI lower	95% CI upper	p-value	n events	Method
Cardiovascular mortality	1.608	1.202	2.157	0.0018	115	PSU-cluster bootstrap (n=200)
Cancer mortality	0.612	0.301	1.246	—	84	Wald CI

## Sheet: Fig12_cox_subgroup_forest
Subgroup	HR	95% CI lower	95% CI upper	n	events
Overall (M3)	1.76	1.32	2.34	2983	302
Chronic disease (DM/HTN/cancer)	1.87	1.43	2.45	2574	343
No chronic disease	1.66	0.6	4.55	938	30
Time stratum 0-3y	1.62	1	2.62	2983	154
Time stratum 3-7y	1.96	1.43	2.7	2983	219
After PhenoAge adjustment	1.64	1.19	2.26	2865	287
Bootstrap median (PSU resample)	1.73	1.11	2.43	2983	302

## Sheet: Table_primary_models
Exposure	Outcome	Model	N	Beta	SE	LCL	UCL	p	Display
OD measured (≥3/8 incorrect)	KDM-BA Acceleration (years)	M1	3263	2.87269	1.65902	-0.378994	6.12438	0.0833526	+2.87 (-0.38, +6.12); p=0.083
OD measured (≥3/8 incorrect)	KDM-BA Acceleration (years)	M2	2989	1.76273	1.46386	-1.10644	4.6319	0.228527	+1.76 (-1.11, +4.63); p=0.229
OD measured (≥3/8 incorrect)	KDM-BA Acceleration (years)	M3	2816	2.67199	1.46298	-0.19546	5.53944	0.0677906	+2.67 (-0.20, +5.54); p=0.068
OD measured (≥3/8 incorrect)	Homeostatic Dysregulation (log)	M1	3263	0.151947	0.0772562	0.000524508	0.303369	0.0492075	+0.15 (+0.00, +0.30); p=0.049
OD measured (≥3/8 incorrect)	Homeostatic Dysregulation (log)	M2	2989	0.0827524	0.0785057	-0.0711187	0.236624	0.291839	+0.08 (-0.07, +0.24); p=0.292
OD measured (≥3/8 incorrect)	Homeostatic Dysregulation (log)	M3	2816	0.131759	0.0843725	-0.0336107	0.29713	0.118373	+0.13 (-0.03, +0.30); p=0.118
OD measured (≥3/8 incorrect)	PhenoAge Acceleration (years)	M1	3350	1.53313	0.668972	0.22195	2.84432	0.0219184	+1.53 (+0.22, +2.84); p=0.022
OD measured (≥3/8 incorrect)	PhenoAge Acceleration (years)	M2	3061	0.837488	0.508434	-0.159043	1.83402	0.0995189	+0.84 (-0.16, +1.83); p=0.100
OD measured (≥3/8 incorrect)	PhenoAge Acceleration (years)	M3	2870	0.991207	0.447138	0.114817	1.8676	0.0266381	+0.99 (+0.11, +1.87); p=0.027
OD score (per 1 odor incorrect)	KDM-BA Acceleration (years)	M1	3263	0.810612	0.498201	-0.165863	1.78709	0.103721	+0.81 (-0.17, +1.79); p=0.104
OD score (per 1 odor incorrect)	KDM-BA Acceleration (years)	M2	2989	0.481503	0.436092	-0.373238	1.33624	0.269536	+0.48 (-0.37, +1.34); p=0.270
OD score (per 1 odor incorrect)	KDM-BA Acceleration (years)	M3	2816	0.663605	0.421461	-0.162458	1.48967	0.115364	+0.66 (-0.16, +1.49); p=0.115
OD score (per 1 odor incorrect)	Homeostatic Dysregulation (log)	M1	3263	0.0381066	0.0219872	-0.00498831	0.0812014	0.0830732	+0.04 (-0.00, +0.08); p=0.083
OD score (per 1 odor incorrect)	Homeostatic Dysregulation (log)	M2	2989	0.0189325	0.0230403	-0.0262265	0.0640915	0.411242	+0.02 (-0.03, +0.06); p=0.411
OD score (per 1 odor incorrect)	Homeostatic Dysregulation (log)	M3	2816	0.027174	0.0222092	-0.016356	0.070704	0.221122	+0.03 (-0.02, +0.07); p=0.221
OD score (per 1 odor incorrect)	PhenoAge Acceleration (years)	M1	3350	0.400578	0.172172	0.0631213	0.738035	0.0199856	+0.40 (+0.06, +0.74); p=0.020
OD score (per 1 odor incorrect)	PhenoAge Acceleration (years)	M2	3061	0.216524	0.148024	-0.0736029	0.50665	0.143532	+0.22 (-0.07, +0.51); p=0.144
OD score (per 1 odor incorrect)	PhenoAge Acceleration (years)	M3	2870	0.295173	0.138714	0.0232936	0.567053	0.0333433	+0.30 (+0.02, +0.57); p=0.033
Severe OD (≥5/8 incorrect)	KDM-BA Acceleration (years)	M1	3263	-2.49464	2.8132	-8.00851	3.01924	0.375208	-2.49 (-8.01, +3.02); p=0.375
Severe OD (≥5/8 incorrect)	KDM-BA Acceleration (years)	M2	2989	-1.22356	2.93726	-6.98059	4.53347	0.676997	-1.22 (-6.98, +4.53); p=0.677
Severe OD (≥5/8 incorrect)	KDM-BA Acceleration (years)	M3	2816	0.901937	3.80034	-6.54673	8.35061	0.8124	+0.90 (-6.55, +8.35); p=0.812
Severe OD (≥5/8 incorrect)	Homeostatic Dysregulation (log)	M1	3263	-0.0132738	0.200879	-0.406997	0.380449	0.947315	-0.01 (-0.41, +0.38); p=0.947
Severe OD (≥5/8 incorrect)	Homeostatic Dysregulation (log)	M2	2989	0.0255623	0.21123	-0.388449	0.439574	0.903678	+0.03 (-0.39, +0.44); p=0.904
Severe OD (≥5/8 incorrect)	Homeostatic Dysregulation (log)	M3	2816	0.120318	0.252049	-0.373699	0.614335	0.633106	+0.12 (-0.37, +0.61); p=0.633
Severe OD (≥5/8 incorrect)	PhenoAge Acceleration (years)	M1	3350	-0.140833	1.56092	-3.20024	2.91858	0.928109	-0.14 (-3.20, +2.92); p=0.928
Severe OD (≥5/8 incorrect)	PhenoAge Acceleration (years)	M2	3061	0.449724	1.49984	-2.48996	3.38941	0.764293	+0.45 (-2.49, +3.39); p=0.764
Severe OD (≥5/8 incorrect)	PhenoAge Acceleration (years)	M3	2870	1.13455	1.69382	-2.18533	4.45443	0.502973	+1.13 (-2.19, +4.45); p=0.503
OD self-reported	KDM-BA Acceleration (years)	M1	3263	1.57998	1.35161	-1.06917	4.22914	0.242417	+1.58 (-1.07, +4.23); p=0.242
OD self-reported	KDM-BA Acceleration (years)	M2	2989	-0.398907	1.50062	-3.34012	2.5423	0.790371	-0.40 (-3.34, +2.54); p=0.790
OD self-reported	KDM-BA Acceleration (years)	M3	2816	0.468607	1.21136	-1.90566	2.84288	0.698873	+0.47 (-1.91, +2.84); p=0.699
OD self-reported	Homeostatic Dysregulation (log)	M1	3263	0.0874799	0.0746577	-0.0588492	0.233809	0.241299	+0.09 (-0.06, +0.23); p=0.241
OD self-reported	Homeostatic Dysregulation (log)	M2	2989	-0.00871502	0.0898664	-0.184853	0.167423	0.922744	-0.01 (-0.18, +0.17); p=0.923
OD self-reported	Homeostatic Dysregulation (log)	M3	2816	0.0270241	0.0681007	-0.106453	0.160502	0.691496	+0.03 (-0.11, +0.16); p=0.691
OD self-reported	PhenoAge Acceleration (years)	M1	3350	0.707317	0.577454	-0.424493	1.83913	0.220617	+0.71 (-0.42, +1.84); p=0.221
OD self-reported	PhenoAge Acceleration (years)	M2	3061	-0.0246953	0.594756	-1.19042	1.14103	0.96688	-0.02 (-1.19, +1.14); p=0.967
OD self-reported	PhenoAge Acceleration (years)	M3	2870	0.233865	0.559553	-0.86286	1.33059	0.675984	+0.23 (-0.86, +1.33); p=0.676

## Sheet: Table_cox_mortality
exposure	outcome	n	events	beta	se	HR	HR_lcl	HR_ucl	p	outcome_label
OD ≥3 wrong	event	2984	301	0.43322	0.112699	1.54222	1.23655	1.92343	0.00012103	All-cause
OD ≥4 wrong	event	2984	301	0.5631	0.146799	1.75611	1.31702	2.34158	0.000125123	All-cause
OD ≥5 wrong	event	2984	301	0.574024	0.164262	1.7754	1.28669	2.44973	0.000474826	All-cause
OD score (per +1)	event	2984	301	0.146071	0.0319373	1.15728	1.08706	1.23204	4.79243e-06	All-cause
PhenoAge Accel (per +1 yr)	event	2865	287	0.0475674	0.00529812	1.04872	1.03788	1.05966	0	All-cause
KDM-BA Accel (per +1 yr)	event	2812	281	0.012594	0.00240763	1.01267	1.00791	1.01746	1.68726e-07	All-cause
HD (per +1 log)	event	2812	281	0.337771	0.0668526	1.40182	1.22966	1.59808	4.36132e-07	All-cause
OD ≥3 wrong	cv_event	2984	88	0.357827	0.209881	1.43022	0.947868	2.15803	0.0882125	Cardiovascular
OD ≥4 wrong	cv_event	2984	88	0.532748	0.29011	1.70361	0.964767	3.00827	0.066304	Cardiovascular
PhenoAge Accel (per +1 yr)	cv_event	2865	84	0.0586316	0.00757162	1.06038	1.04476	1.07624	9.76996e-15	Cardiovascular
OD ≥3 wrong	cancer_event	2984	72	-0.288807	0.295456	0.749157	0.419832	1.33681	0.328324	Cancer
OD ≥4 wrong	cancer_event	2984	72	-0.554686	0.338929	0.574253	0.295529	1.11585	0.101718	Cancer
PhenoAge Accel (per +1 yr)	cancer_event	2865	67	0.0361237	0.00982697	1.03678	1.01701	1.05695	0.000236939	Cancer

[truncated: 10 more sheets: Fig3_RCS_dose_response, Fig4_PSM_balance, Fig8_subgroup_forest, Fig9_KaplanMeier, Fig10_triangulation, FigS1_NLR_validation, FigS2_clock_replication, FigS3_time_varying, FigS4_PBA, Fig14_cumulative_mediation]
